# Supplementary material for: Three-dimensional porous structured germanium anode materials for high-performance lithium-ion full-cells
Source: Royal Society of Chemistry journal article supplement (doi:10.1039/d2dt01528e), 2022-01-01
Supplement: d2dt01528e1.pdf [file d2dt01528e1.pdf]

Supporting Information

# Three-dimensional porous structured germanium anode materials for High-Performance Lithium-Ion Full-cell

*Yan Zhang<sup>1</sup>, Naigen Zhou<sup>2</sup>, Xiang Liu<sup>2</sup>, Xinhua Gao<sup>3</sup>, Shan Fang<sup>2\*</sup>*

<sup>1</sup>Engineering Research Center of Nuclear Technology Application, Ministry of Education, East China University of Technology, Nanchang, 330013, China

<sup>2</sup>School of Physics and Materials, Nanchang University, Nanchang, 330031, China

<sup>3</sup>State Key Laboratory of High-efficiency Utilization of Coal and Green Chemical Engineering, Yinchuan, 750014, China

Corresponding Author: fangshan@ncu.edu.cn

## **Experimental section**

### **Material synthesis**

Synthesis of 3D Ge/C: Poly(ethylene oxide)-poly(propylene oxide)-poly(ethylene oxide), PEO-PPO-PEO (F127) was introduced as a structure direct agent, resol (phenol formaldehyde resin) as a carbon precursor which was synthesized according to a literature,<sup>[1]</sup> and germanium dioxide (GeO<sub>2</sub>) as a germanium source. 3.0 g resol was dissolved in 15.0 g anhydrous ethanol, then add 1.0 g Pluronic F127 into this solution and stirred until it completely dissolved. 1.0 g GeO<sub>2</sub> dissolved in ethylenediamine (EDA) aqueous (5.2 g H<sub>2</sub>O+5.0 g EDA), after that add this Ge precursor solution into above solution and stirring at

50 °C for 48 h to evaporate the solution and form a homogeneous gel. After that, the sticky gel was transferred to an oven to further thermal polymerization phenolic resin at 100 °C for 24 h. The final products were obtained by carbonization the precursor at 750 °C for 5 h with a heating rate of 2 °C min<sup>-1</sup> in an inert atmosphere. As a comparison, the Ge/C composite was synthesised under the same condition without adding F127.

### **Material characterization**

The crystal structure of the Ge/C and 3D Ge/C nanocomposite was characterized by X-ray diffraction (XRD) (Bruker D8 advance) with Cu K $\alpha$  radiation. Raman spectrum was performed with 514.5 nm wavelength to check the compositions and the carbon of the product by EA (Vario EL-III). The morphology of the samples was studied by SEM (HITACHI S-4800) and TEM (JEOL JEM-2010). Thermogravimetric analysis was conducted on a TGA instrument (NETZSCH STA 409 PC) under ambient flow, the heating rate is 10 °C min<sup>-1</sup>. The X-ray photoelectron spectroscopy (XPS) measured by a Perkin–Elmer PHI 550 spectrometer with the X-ray source of Al K $\alpha$  (1486.6 eV). The surface area of the materials was characterised by an ASAP-2010 surface area analyser.

### **Electrochemical Test**

Electrochemical characterizations were studied by galvanostatic discharge/charge in a 2016 coin-type cell for half-cell. The active materials, carboxymethyl cellulose, polyacrylic acid binder and carbon black were mixed with a mass ratio of 70: 7.5:7.5:15, deionized water was used as a solvent to form homogeneous slurry, and then uniformly coated it on a copper foil. According to the TGA result, the content of Ge in the 3D Ge/C composite is 69%. The active material percentage is 70% during slurry making. Thus, the actual weight percentage of Ge in

electrode is 48.3%. The area mass loading of active material was  $\sim 0.7 \text{ mg cm}^{-2}$ ,  $\sim 1.5 \text{ mg cm}^{-2}$ ,  $\sim 2.5 \text{ mg cm}^{-2}$  and  $\sim 3 \text{ mg cm}^{-2}$ . The cells were assembled with 3D Ge/C or Ge/C as working electrode, lithium metal was used as a counter and reference electrode in an Ar-filled glove box. The electrolyte was consist of 1 M  $\text{LiPF}_6$  solution in a mixture of 1:1 v/v ethylene carbonate (EC) and dimethyl carbonate (DMC) and contained 2% (V) fluoroethylene carbonate (FEC). The electrolyte used in both half-cell is 60  $\mu\text{L}$ . Galvanostatically discharge/charge cycles were measured between 0.01 and 1.5 V by a cell test device of CT2001A (LAND Electronic Co.). The volume capacity of the half-cell is calculated based on the thickness and surface area of the electrode. EIS measurements were performed at a frequency range of 0.01-100 kHz. As NCM cathode electrode, the slurry was consisting of NCM (811), carbon black and PVDF with a mass ration of 92:4:4, NMP was used as solvent. The active material mass loading is  $\sim 4 \text{ mg cm}^{-2}$ . The prelithiation of the 3D Ge/C anode for the full-cell tests was performed by dis-/charging the half-cell at  $0.1 \text{ A g}^{-1}$  for 10 cycles. Subsequently, the cell was disassembled under argon atmosphere to recover the electrode for the full-cell assembly, combining the prelithiated anode with the NMC811 cathode. The 3D Ge/C||NCM88 full cells were cycled between 2.0 - 4.1 V, after the first two cycle at 0.1 C (1 C =  $200 \text{ mA g}^{-1}$ ), then cycled at 1 C. Galvanostatically discharge/charge cycles of the full cell were measured in a swagelok T-cell between 2.0 and 4.1 V, Li metal was used as reference electrode.

## Reference

- [1] A. Tejado, C. Pena, J. Labidi, J.M. Echeverria and I. Mondragon, *Bioresource Technol*, 2007, 98, 1655-1663.

- [2] S. Choi, J. Kim, N.-S. Choi, M. G. Kim, S. Park, ACS Nano 2015, 9, 2203.
- [3] D. T. Ngo, H. T. T. Le, C. Kim, J. Y. Lee, J. G. Fisher, I. D. Kim, C. J. Park, Energy Environ. Sci. 2015, 8, 3577.
- [4] F. W. Yuan, H. Y. Tuan, Chem. Mater. 2014, 26, 2172.
- [5] D. T. Ngo, H. T. T. Le, R. S. Kalubarme, J.-Y. Lee, C.-N. Park, C.-J. Park, J. Mater. Chem. A 2015, 3, 21722.
- [6] C. Kim, G. Hwang, J. W. Jung, S. H. Cho, J. Y. Cheong, S. Shin, S. Park, I. D. Kim, Adv. Funct. Mater. 2017, 27, 1605975.
- [7] Bangrun Wang, Jun Jin, Zhaoyin Wen, Chem Eng J, 2019, 360, 1301-1309.

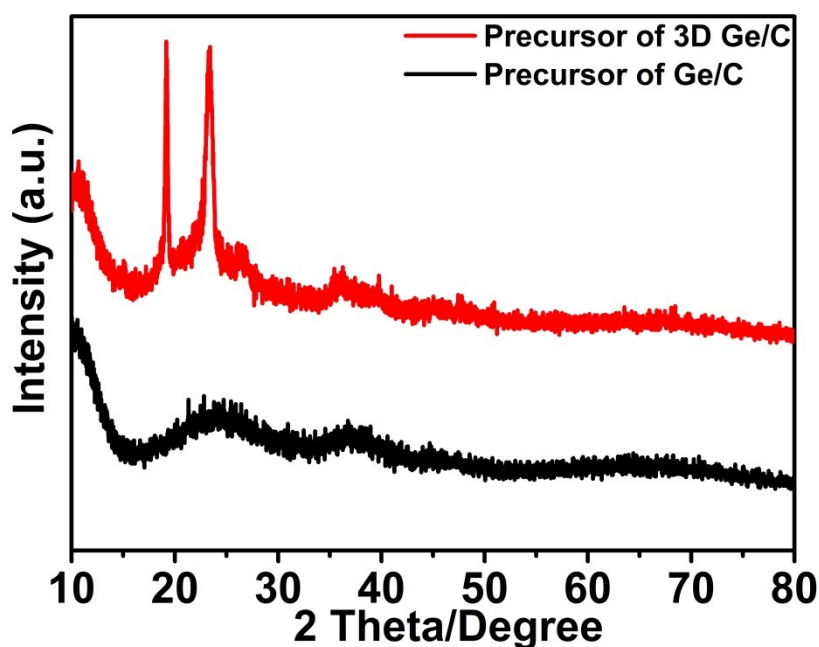

Figure S1. The XRD patterns of the precursor of 3D Ge/C and Ge/C.

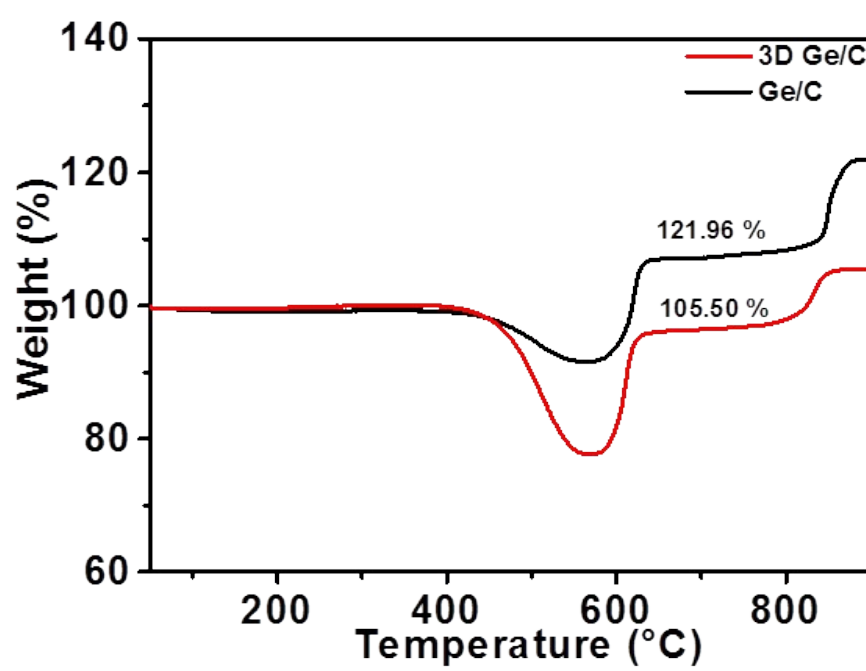

Figure S2. TGA curves of 3D Ge/C and Ge/C.

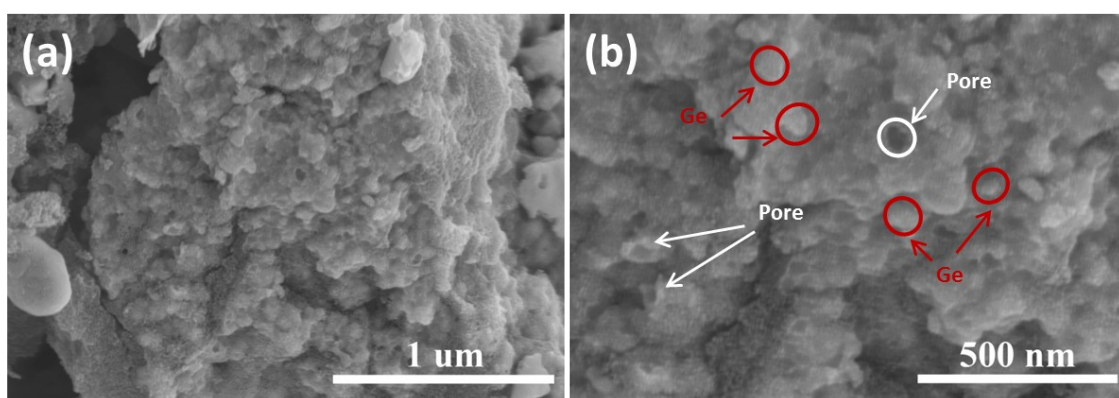

Figure S3 SEM images of Ge/C composite materials.

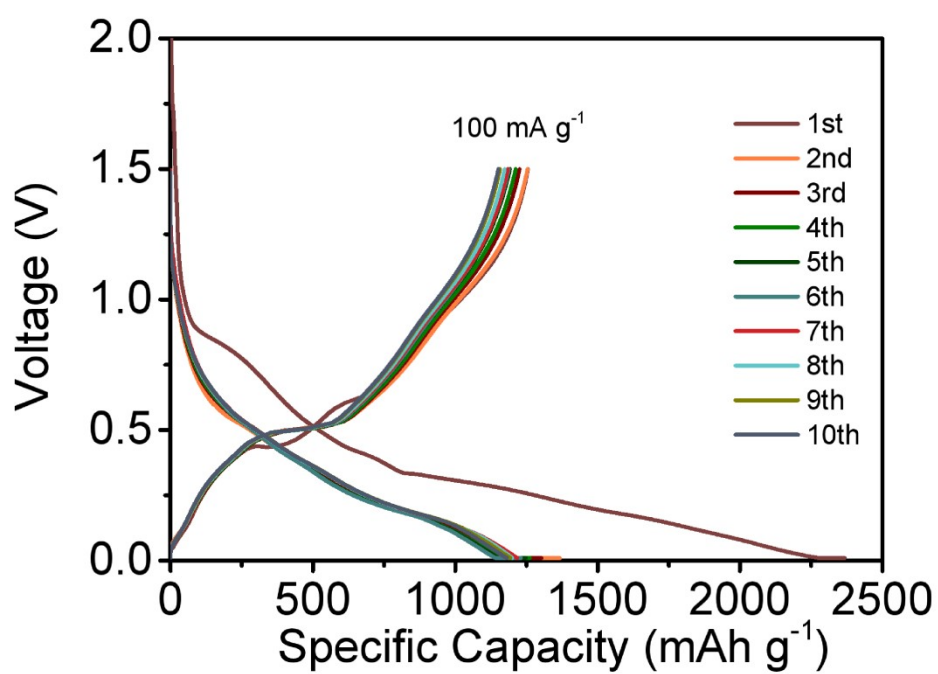

Figure S4. The first ten discharge/charge profiles of 3D Ge/C under the current density of  $100 \text{ mA g}^{-1}$ .

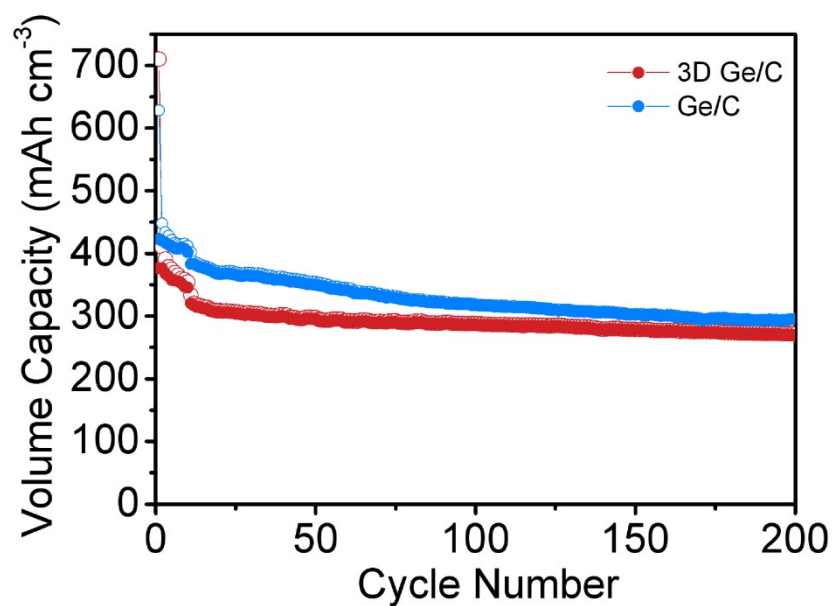

Figure S5. The volume capacity of 3D Ge/C and Ge/C half-cell calculated based on the thickness and surface area of the electrode.

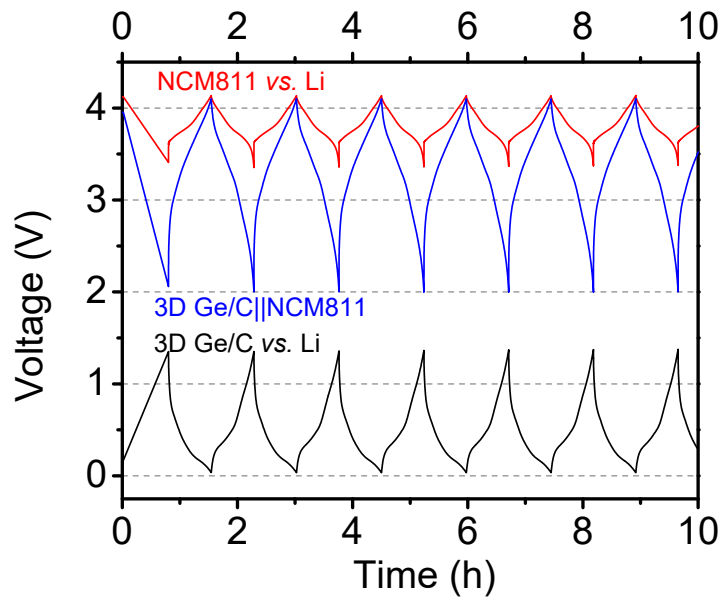

Figure S6. The voltage-time curves of the 3D Ge/C||NCM811 full cell (blue), NCM811 vs. Li (red) and 3D Ge/C vs. Li (black) for first few cycles.

Table S1. Full-cell electrochemical performance comparison with literature.

| Anode material                               | Synthetic method               | Initial CE of half-cell | Cathode material                                                       | Full-cell capacity retention                            | Energy density (Wh kg <sup>-1</sup> ) | Ref.      |
|----------------------------------------------|--------------------------------|-------------------------|------------------------------------------------------------------------|---------------------------------------------------------|---------------------------------------|-----------|
| Mesoporous Ge particles                      | Redox-Transmetalation reaction | 89                      | LiCoO <sub>2</sub>                                                     | 80% retention after 100 cycles                          | N/A                                   | 2         |
| 3D porous Ge-C                               | Carbothermal reduction         | 70.16                   | LiCoO <sub>2</sub>                                                     | 94.7% retention after 50 cycles                         | N/A                                   | 3         |
| GeNPs/graphene                               | Solution-based                 | 43                      | LiCoO <sub>2</sub>                                                     | 90% retention after 50 cycles                           | N/A                                   | 4         |
| GeO <sub>2</sub> /N-C                        | Sol-gel and calcination        | 49.6                    | LiCoO <sub>2</sub>                                                     | 70% retention after 100 cycles                          | N/A                                   | 5         |
| Micronized Ge <sub>3</sub> N <sub>4</sub> @C | Wet oxidation and nitridation  | 78                      | LiCoO <sub>2</sub>                                                     | 77% retention after 100 cycles                          | N/A                                   | 6         |
| Ge@NC                                        | spray pyrolysis technique      | 73                      | LiNi <sub>0.5</sub> Co <sub>0.2</sub> Mn <sub>0.3</sub> O <sub>2</sub> | 64% retention after 200 cycles                          | 340                                   | 7         |
| 3D Ge/C                                      | Solution-based                 | 53                      | LiNi <sub>0.8</sub> Co <sub>0.1</sub> Mn <sub>0.1</sub> O <sub>2</sub> | 84% retention after 100, 70% retention after 200 cycles | 396                                   | This work |
